# Supplementary material for: De Novo Genome Assembly of the Sea Star Patiria pectinifera (Muller & Troschel, 1842) Using Oxford Nanopore Technology and Illumina Platforms
Source: MDPI journal article supplement (doi:10.3390/d16020091), 2024-01-31
Supplement: s1 [file s1]

## < Supplementary Materials >

### ***De novo* genome assembly of the sea star *Patiria pectinifera* (Muller & Troschel, 1842) using Oxford Nanopore Technology and Illumina platforms**

Jae-Sung Rhee<sup>1,2,3</sup>, Sang-Eun Nam<sup>1</sup>, Seung Jae Lee<sup>4</sup>, Hyun Park<sup>4,\*</sup>

<sup>1</sup> *Department of Marine Science, College of Natural Sciences, Incheon National University, Incheon 22012, Republic of Korea*

<sup>2</sup> *Research Institute of Basic Sciences, Incheon National University, Incheon 22012, Republic of Korea*

<sup>3</sup> *Yellow Sea Research Institute, Incheon 22012, Republic of Korea*

<sup>4</sup> *Division of Biotechnology, College of Life Sciences and Biotechnology, Korea University, Seoul 02841, Republic of Korea*

---

\*Corresponding author:

Hyun Park

Division of Biotechnology, College of Life Sciences and Biotechnology, Korea University, Seoul 02841, Republic of Korea; E-mail address: hpark@korea.ac.kr (H. Park)

**Table S1.** Statistics on sequencing data generated for *Patiria pectinifera* genome assembly.

| Platform   | Number of bases | Number of reads | N50   | Mean read length | Max read length |
|------------|-----------------|-----------------|-------|------------------|-----------------|
| PromethION | 59,829,552,714  | 13,848,344      | 9,618 | 4,320            | 184,534         |
| Illumina   | 23,688,630,548  | 156,878,348     | -     | -                | 151             |

**Table S2.** Statistics for the gene annotation in the *Patiria pectinifera* genome.

|                                | ARCS        |
|--------------------------------|-------------|
| Gene Length Sum (bp)           | 301,691,716 |
| Gene Count                     | 17,334      |
| Exon Length Sum (bp)           | 32,514,475  |
| Exon Count                     | 152,041     |
| CDS Length Sum (bp)            | 28,716,363  |
| CDS Count                      | 149,103     |
| Blast nrDB                     | 17,082      |
| Uniprot/Swiss-prot Annotations | 10,003      |
| Gene Ontology Annotations      | 12,698      |
| KEGG Annotations               | 7,880       |
| InterProScan Annotations       | 14,323      |
| Pfam Annotations               | 8,915       |
| TmHMM Annotation               | 4,833       |
| EggNOG Annotations             | 11,351      |
| 1 > Databases                  | 15,444      |

**Table S3.** Statistics for repetitive elements identified in the *Patiria pectinifera* genome.

| Repeat classes |               | <i>Patiria pectinifera</i> |             |            | <i>Patiria miniata</i> |             |            | <i>Acanthaster planci</i> |             |            | <i>Asterias rubens</i> |             |            |
|----------------|---------------|----------------------------|-------------|------------|------------------------|-------------|------------|---------------------------|-------------|------------|------------------------|-------------|------------|
| Class          |               | Count                      | Masked (bp) | Masked (%) | Count                  | Masked (bp) | Masked (%) | Count                     | Masked (bp) | Masked (%) | Count                  | Masked (bp) | Masked (%) |
| <b>DNA</b>     |               | 5,842                      | 1,414,531   | 0.28%      | 11,180                 | 4,496,481   | 0.74%      | 4,720                     | 861,563     | 0.22%      | 6,929                  | 996,285     | 0.24%      |
|                | Academ-1      | 6,381                      | 1,548,125   | 0.31%      | 9,567                  | 2,469,193   | 0.41%      | 217                       | 92,387      | 0.02%      | 2,119                  | 390,471     | 0.09%      |
|                | Academ-2      |                            |             |            | 113                    | 25,242      | 0.00%      | 103                       | 34,658      | 0.01%      |                        |             |            |
|                | CMC-Chapaev   | 179                        | 31,562      | 0.01%      | 28                     | 20,141      | 0.00%      | 49                        | 37,880      | 0.01%      | 204                    | 81,897      | 0.02%      |
|                | CMC-Chapaev-3 |                            |             |            |                        |             |            | 39                        | 6,808       | 0.00%      |                        |             |            |
|                | CMC-EnSpm     | 3,568                      | 788,869     | 0.16%      | 14,405                 | 2,357,774   | 0.39%      | 3,406                     | 443,177     | 0.12%      | 1,282                  | 352,582     | 0.08%      |
|                | CMC-Transib   | 112                        | 63,609      | 0.01%      | 260                    | 127,681     | 0.02%      |                           |             |            | 133                    | 63,830      | 0.02%      |
|                | Crypton-A     | 7,104                      | 1,229,456   | 0.25%      | 10,067                 | 2,225,128   | 0.37%      | 1,566                     | 189,501     | 0.05%      | 4,921                  | 1,120,538   | 0.27%      |
|                | Crypton-H     | 217                        | 53,309      | 0.01%      |                        |             |            | 21                        | 3,144       | 0.00%      |                        |             |            |
|                | Crypton-V     |                            |             |            | 155                    | 26,112      | 0.00%      | 1,024                     | 309,958     | 0.08%      | 53                     | 76,018      | 0.02%      |
|                | Ginger-2      | 487                        | 72,622      | 0.01%      | 300                    | 33,133      | 0.01%      | 96                        | 16,755      | 0.00%      | 143                    | 16,039      | 0.00%      |
|                | IS3EU         | 1,379                      | 259,094     | 0.05%      | 3,115                  | 691,400     | 0.11%      | 1,065                     | 246,171     | 0.06%      | 112                    | 25,050      | 0.01%      |
|                | Kolobok-Hydra |                            |             |            | 76                     | 73,050      | 0.01%      | 160                       | 9,154       | 0.00%      | 1,203                  | 266,627     | 0.06%      |
|                | Kolobok-T2    | 519                        | 67,377      | 0.01%      | 2,800                  | 733,899     | 0.12%      |                           |             |            | 591                    | 196,527     | 0.05%      |
|                | MULE-MuDR     | 12,440                     | 1,419,288   | 0.28%      | 8,728                  | 1,247,743   | 0.21%      | 4,785                     | 850,142     | 0.22%      | 3,583                  | 1,008,590   | 0.24%      |
|                | Maverick      | 1,759                      | 2,099,196   | 0.42%      | 83                     | 44,470      | 0.01%      | 3,533                     | 2,357,883   | 0.61%      | 95                     | 27,179      | 0.01%      |
|                | Merlin        |                            |             |            | 469                    | 1,354,891   | 0.22%      | 151                       | 16,439      | 0.00%      | 70                     | 39,685      | 0.01%      |
|                | P             | 1,673                      | 261,065     | 0.05%      | 84                     | 7,602       | 0.00%      | 598                       | 161,948     | 0.04%      |                        |             |            |
|                | PIF-HarbS     |                            |             |            |                        |             |            | 50                        | 12,925      | 0.00%      |                        |             |            |
|                | PIF-Harbinger | 2,984                      | 795,620     | 0.16%      | 6,176                  | 1,130,592   | 0.19%      | 856                       | 196,383     | 0.05%      | 585                    | 214,993     | 0.05%      |
|                | PIF-ISL2EU    | 1,456                      | 296,592     | 0.06%      | 388                    | 41,966      | 0.01%      | 225                       | 61,738      | 0.02%      |                        |             |            |
|                | PiggyBac      | 2,229                      | 369,359     | 0.07%      | 2,453                  | 411,604     | 0.07%      | 973                       | 238,323     | 0.06%      | 124                    | 77,680      | 0.02%      |
|                | Sola-1        | 526                        | 167,598     | 0.03%      | 794                    | 543,870     | 0.09%      |                           |             |            |                        |             |            |
|                | Sola-2        | 2,566                      | 910,762     | 0.18%      | 7,303                  | 1,743,007   | 0.29%      | 1,385                     | 253,554     | 0.07%      | 1,035                  | 395,430     | 0.09%      |
|                | Sola-3        | 575                        | 324,419     | 0.07%      | 530                    | 198,438     | 0.03%      |                           |             |            |                        |             |            |
|                | TcMar         |                            |             |            | 315                    | 109,136     | 0.02%      | 82                        | 10,996      | 0.00%      |                        |             |            |
|                | TcMar-ISRm11  | 3,036                      | 897,913     | 0.18%      | 3,991                  | 1,172,210   | 0.19%      | 635                       | 212,453     | 0.06%      | 2,898                  | 535,955     | 0.13%      |

|      |               |        |           |       |        |           |       |        |           |       |        |           |       |
|------|---------------|--------|-----------|-------|--------|-----------|-------|--------|-----------|-------|--------|-----------|-------|
|      | TcMar-Pogo    | 1,090  | 176,618   | 0.04% | 1,222  | 219,124   | 0.04% | 1,784  | 356,747   | 0.09% |        |           |       |
|      | TcMar-Tc1     | 836    | 171,274   | 0.03% | 1,387  | 366,669   | 0.06% | 2,852  | 694,948   | 0.18% | 1,791  | 444,841   | 0.11% |
|      | TcMar-Tc2     | 1,764  | 588,844   | 0.12% | 2,453  | 1,321,984 | 0.22% | 398    | 78,205    | 0.02% | 1,021  | 239,109   | 0.06% |
|      | TcMar-Tigger  | 672    | 82,491    | 0.02% | 1,246  | 173,104   | 0.03% | 125    | 26,001    | 0.01% | 2,790  | 326,569   | 0.08% |
|      | Zator         | 21,186 | 4,697,247 | 0.94% | 25,915 | 5,374,268 | 0.88% | 2,952  | 800,419   | 0.21% | 3,757  | 594,697   | 0.14% |
|      | hAT           | 1,796  | 445,049   | 0.09% | 3,309  | 846,634   | 0.14% | 660    | 203,167   | 0.05% | 4,502  | 615,434   | 0.15% |
|      | hAT-Ac        | 14,719 | 2,552,176 | 0.51% | 22,749 | 4,341,455 | 0.71% | 8,785  | 1,852,322 | 0.48% | 872    | 144,164   | 0.03% |
|      | hAT-Blackjack | 9,506  | 2,087,488 | 0.42% | 13,474 | 3,556,665 | 0.58% | 1,273  | 307,401   | 0.08% | 1,807  | 215,700   | 0.05% |
|      | hAT-Charlie   | 307    | 132,632   | 0.03% | 1,083  | 125,200   | 0.02% | 96     | 11,690    | 0.00% | 141    | 37,816    | 0.01% |
|      | hAT-Tag1      | 1,126  | 236,550   | 0.05% | 658    | 81,605    | 0.01% | 549    | 139,311   | 0.04% | 1,127  | 343,055   | 0.08% |
|      | hAT-Tip100    | 11,476 | 2,143,618 | 0.43% | 14,410 | 2,491,353 | 0.41% | 4,683  | 889,240   | 0.23% | 474    | 158,854   | 0.04% |
|      | hAT-hAT19     |        |           |       |        |           |       |        |           |       | 121    | 53,802    | 0.01% |
|      | hAT-hAT5      | 1,834  | 270,129   | 0.05% | 1,580  | 259,614   | 0.04% | 1,529  | 235,249   | 0.06% | 137    | 21,201    | 0.01% |
|      | hAT-hAT6      | 223    | 17,690    | 0.00% | 74     | 10,678    | 0.00% |        |           |       | 634    | 145,022   | 0.03% |
|      | hAT-hATw      |        |           |       |        |           |       | 225    | 59,577    | 0.02% |        |           |       |
|      | hAT-hATx      |        |           |       |        |           |       | 117    | 80,220    | 0.02% |        |           |       |
| LINE |               | 379    | 212,180   | 0.04% | 684    | 124,394   | 0.02% | 50     | 19,469    | 0.01% | 207    | 30,266    | 0.01% |
|      | CR1           | 3,817  | 744,857   | 0.15% | 6,777  | 1,592,001 | 0.26% | 2,444  | 680,758   | 0.18% | 12,730 | 2,016,198 | 0.48% |
|      | CR1-Zenon     | 176    | 35,563    | 0.01% | 288    | 63,806    | 0.01% | 29     | 3,882     | 0.00% | 348    | 55,888    | 0.01% |
|      | CRE-Ambal     |        |           |       |        |           |       |        |           |       | 89     | 35,551    | 0.01% |
|      | Dong-R4       |        |           |       | 31     | 9,898     | 0.00% | 31     | 17,282    | 0.00% | 1,078  | 361,595   | 0.09% |
|      | I             | 1,003  | 418,202   | 0.08% | 79     | 62,374    | 0.01% | 320    | 270,663   | 0.07% |        |           |       |
|      | I-Jockey      | 1,582  | 584,744   | 0.12% | 5,227  | 1,267,329 | 0.21% | 398    | 95,268    | 0.02% | 1,723  | 446,875   | 0.11% |
|      | L1            | 648    | 319,984   | 0.06% | 4,272  | 1,392,875 | 0.23% | 277    | 158,678   | 0.04% | 125    | 14,468    | 0.00% |
|      | L1-Tx1        | 4,401  | 857,499   | 0.17% | 3,995  | 650,067   | 0.11% | 4,207  | 661,147   | 0.17% | 821    | 241,507   | 0.06% |
|      | L2            | 15,073 | 2,522,280 | 0.51% | 15,985 | 3,175,169 | 0.52% | 24,494 | 3,065,837 | 0.80% | 29,576 | 5,562,663 | 1.33% |
|      | Penelope      | 5,876  | 1,459,695 | 0.29% | 10,020 | 3,022,512 | 0.50% | 4,025  | 1,112,629 | 0.29% | 4,735  | 1,172,310 | 0.28% |
|      | Proto2        | 36     | 9,023     | 0.00% |        |           |       |        |           |       |        |           |       |
|      | R1-LOA        |        |           |       |        |           |       | 60     | 16,639    | 0.00% |        |           |       |
|      | R2-NeSL       |        |           |       | 79     | 82,180    | 0.01% | 31     | 12,560    | 0.00% |        |           |       |
|      | R2-Hero       | 42     | 25,193    | 0.01% | 93     | 45,198    | 0.01% |        |           |       | 58     | 10,344    | 0.00% |

|      |              |        |            |       |        |            |       |       |           |       |        |           |       |
|------|--------------|--------|------------|-------|--------|------------|-------|-------|-----------|-------|--------|-----------|-------|
| LTR  | RTE-BovB     | 5,016  | 1,208,223  | 0.24% | 4,232  | 1,908,876  | 0.31% | 886   | 422,426   | 0.11% | 4,496  | 942,329   | 0.23% |
|      | RTE-RTE      | 154    | 65,408     | 0.01% | 192    | 79,225     | 0.01% |       |           |       | 3,470  | 396,606   | 0.09% |
|      | RTE-X        | 83     | 31,805     | 0.01% |        |            |       |       |           |       | 160    | 38,526    | 0.01% |
|      | Rex-Babar    | 1,558  | 438,686    | 0.09% | 2,033  | 668,434    | 0.11% | 1,032 | 338,850   | 0.09% | 2,729  | 508,000   | 0.12% |
|      |              | 535    | 29,732     | 0.01% |        |            |       |       |           |       | 1,120  | 126,732   | 0.03% |
|      | Caulimovirus | 473    | 80,692     | 0.02% | 1,158  | 297,713    | 0.05% |       |           |       | 45     | 12,436    | 0.00% |
|      | Copia        | 2,119  | 911,159    | 0.18% | 3,536  | 1,182,038  | 0.19% | 1,607 | 402,589   | 0.10% | 982    | 233,442   | 0.06% |
|      | DIRS         | 2,971  | 926,812    | 0.19% | 4,116  | 1,788,789  | 0.29% | 2,821 | 1,432,384 | 0.37% | 4,535  | 1,677,849 | 0.40% |
|      | ERV1         | 6      | 1,228      | 0.00% |        |            |       | 83    | 26,488    | 0.01% | 1,818  | 161,034   | 0.04% |
|      | ERV4         | 456    | 202,562    | 0.04% | 308    | 105,863    | 0.02% |       |           |       |        |           |       |
|      | ERVK         | 318    | 315,880    | 0.06% | 178    | 53,951     | 0.01% | 107   | 51,570    | 0.01% | 242    | 90,872    | 0.02% |
|      | Gypsy        | 26,838 | 12,583,090 | 2.52% | 38,894 | 18,447,746 | 3.03% | 9,707 | 2,109,810 | 0.55% | 12,198 | 4,600,868 | 1.10% |
|      | Ngaro        | 2,147  | 685,548    | 0.14% | 3,022  | 949,388    | 0.16% | 2,013 | 828,352   | 0.22% | 8,339  | 944,640   | 0.23% |
|      | Pao          | 413    | 643,911    | 0.13% | 1,802  | 637,566    | 0.10% | 1,719 | 434,557   | 0.11% | 147    | 49,204    | 0.01% |
|      | unknown      | 68,069 | 12,102,146 | 2.43% | 39,097 | 8,378,310  | 1.38% | 379   | 117,367   | 0.03% | 37,338 | 3,193,495 | 0.76% |
| RC   |              |        |            |       |        |            |       |       |           |       |        |           |       |
| SINE | Helitron     | 10,292 | 2,999,931  | 0.60% | 12,574 | 3,186,280  | 0.52% | 730   | 112,229   | 0.03% | 1,754  | 486,564   | 0.12% |
|      |              | 1,033  | 91,436     | 0.02% |        |            |       |       |           |       | 942    | 79,756    | 0.02% |
|      | 5S-Deu-L2    | 1,498  | 316,119    | 0.06% |        |            |       |       |           |       | 21,524 | 2,470,497 | 0.59% |
|      | Alu          |        |            |       |        |            |       |       |           |       | 191    | 19,230    | 0.00% |
|      | B2           |        |            |       |        |            |       | 975   | 252,265   | 0.07% |        |           |       |
|      | MIR          | 19,648 | 4,151,487  | 0.83% | 25,988 | 4,942,793  | 0.81% | 3,648 | 704,284   | 0.18% | 48,491 | 7,043,830 | 1.69% |
|      | tRNA         | 1,648  | 182,875    | 0.04% | 1,395  | 524,043    | 0.09% |       |           |       | 21,134 | 2,307,199 | 0.55% |
|      | tRNA-Core    | 230    | 50,698     | 0.01% | 6,037  | 419,663    | 0.07% | 83    | 55,624    | 0.01% | 260    | 17,538    | 0.00% |
|      | tRNA-Deu     | 490    | 32,025     | 0.01% |        |            |       |       |           |       | 9,297  | 1,052,915 | 0.25% |
|      | tRNA-Deu-CR1 | 4,848  | 952,426    | 0.19% | 4,631  | 956,186    | 0.16% |       |           |       |        |           |       |
|      | tRNA-Deu-L2  | 3,353  | 799,056    | 0.16% | 5,888  | 1,176,235  | 0.19% |       |           |       | 10,477 | 1,258,137 | 0.30% |
|      | tRNA-L2      |        |            |       |        |            |       |       |           |       | 6,416  | 834,202   | 0.20% |
|      | tRNA-Meta    | 7,111  | 818,500    | 0.16% | 12,740 | 2,036,071  | 0.33% |       |           |       | 14,584 | 1,888,649 | 0.45% |
|      | tRNA-Rex     | 352    | 61,973     | 0.01% |        |            |       |       |           |       | 2,133  | 482,172   | 0.12% |
|      | tRNA-V       | 2,948  | 458,897    | 0.09% | 2,925  | 454,839    | 0.07% | 4,326 | 859,152   | 0.22% | 1,215  | 152,951   | 0.04% |

|                |                       |           |             |        |           |             |        |         |             |        |           |             |        |
|----------------|-----------------------|-----------|-------------|--------|-----------|-------------|--------|---------|-------------|--------|-----------|-------------|--------|
|                | tRNA-V-CR1            |           |             |        |           |             |        |         |             |        | 3,861     | 391,943     | 0.09%  |
|                | tRNA-V-<br>Core-L2    |           |             |        |           |             |        |         |             |        | 1,412     | 126,453     | 0.03%  |
| <b>Unknown</b> |                       | 722,482   | 155,455,390 | 31.17% | 869,929   | 205,609,124 | 33.80% | 399,290 | 80,015,764  | 20.86% | 802,360   | 133,214,604 | 31.90% |
|                | Total<br>interspersed | 1,042,396 | 230,717,756 | 46.26% | 1,262,468 | 306,115,365 | 50.32% | 517,539 | 106,636,960 | 27.79% | 1,120,635 | 183,986,722 | 44.06% |
| Low_complexity |                       | 479,257   | 0           |        | 11,676    | 598,998     | 0.10%  | 6,311   | 294,823     | 0.08%  | 10,343    | 515,457     | 0.12%  |
| Satellite      |                       | 3,734     | 1,209,123   | 0.24%  | 4,554     | 1,332,430   | 0.22%  | 781     | 216,766     | 0.06%  | 15,756    | 2,023,338   | 0.48%  |
| Simple_repeat  |                       | 2,908,314 | 0           |        | 80,191    | 4,228,331   | 0.70%  | 34,867  | 1,490,287   | 0.39%  | 72,594    | 3,422,698   | 0.82%  |
| rRNA           |                       | 124       | 82,458      | 0.02%  | 153       | 271,329     | 0.04%  | 159     | 99,740      | 0.03%  | 56        | 14,416      | 0.00%  |
| tRNA           |                       | 7,580     | 1,004,033   | 0.20%  | 12,265    | 1,665,294   | 0.27%  | 4,333   | 549,940     | 0.14%  | 12,538    | 1,583,110   | 0.38%  |
| Total          |                       | 1,121,079 | 236,556,532 | 47.43% | 1,371,307 | 314,211,747 | 51.65% | 563,990 | 109,288,516 | 28.48% | 1,231,922 | 191,545,741 | 45.87% |
